# Supplementary material
Source: Springer Nature journal article supplement (https://www.springermedizin.de/resource/supplementary/12913_2013_3154_MOESM1_ESM.pdf/9532572)
Supplement: MOESM1 [file 9532572]

Vaccination and Infection Control Office (VICO)

September 2009  
Control Inclusion start

August 2010  
Control Inclusion stop

July 2011  
Project Inclusion start

June 2012  
Project Inclusion stop

Data collected in the municipality

Data collected at the hospital

Timeline →

Refugee Healthcare Centre (RHC)

October 2010  
Control Inclusion start

April 2011  
Control Inclusion stop

September 2011  
Project Inclusion start

June 2012  
Project Inclusion stop
